# Supplementary material for: Association of protein kinase CK2 inhibition with cellular radiosensitivity of non-small cell lung cancer
Source: PubMed Central journal article supplement (PMC5700935; doi:10.1038/s41598-017-16012-1), 2017-11-23
Supplement: 41598_2017_16012_MOESM1_ESM.pdf [file 41598_2017_16012_MOESM1_ESM.pdf]

## **Association of protein kinase CK2 inhibition with cellular radiosensitivity of non-small cell lung cancer**

Qianwen Li<sup>1</sup>, Ke Li<sup>2</sup>, Tianyang Yang<sup>1</sup>, Sheng Zhang<sup>1</sup>, Yu Zhou<sup>1, 3</sup>, Zhenyu Li<sup>1</sup>, Jinrong Xiong<sup>4</sup>, Fangzheng Zhou<sup>1</sup>, Xiaoshu Zhou<sup>1</sup>, Li Liu<sup>1</sup>, Rui Meng<sup>1\*</sup>, Gang Wu<sup>1\*</sup>

1 Cancer Center, Union Hospital, Tongji Medical College, Huazhong University of Science and Technology, Wuhan 430022, China

2 Pharmacy Department, Union Hospital, Tongji Medical College, Huazhong University of Science and Technology, Wuhan 430022, China

3 Department of Nuclear Medicine, Tongji Hospital, Tongji Medical College, Huazhong University of Science and Technology, Wuhan 430030, China

4 Oncology department, The Chinese People's Liberation Army 457 Hospital, Wuhan 430012, China

\* co-corresponding authors

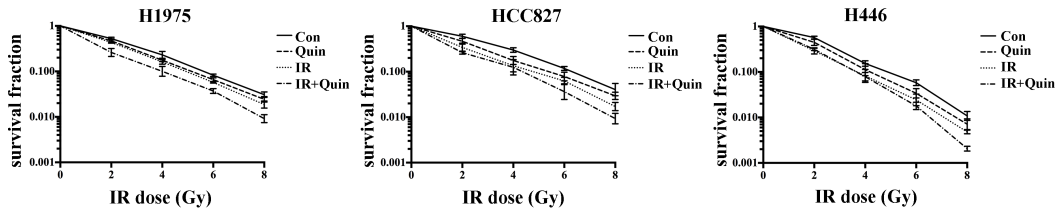

Supplementary Fig.S1 H1975, HCC827 and H446 cells were treated with DMSO or 12.5, 25, 50 $\mu$ M Quinalizarin for 24h, then exposed to 0, 2, 4, 6, 8Gy X-ray. The culture medium was changed to the fresh one 24h after IR. After further incubation for 14 days, radiosensitivity of the cells was measured by colony formation assay. Mean  $\pm$  S.D. were calculated for three independent experiments.

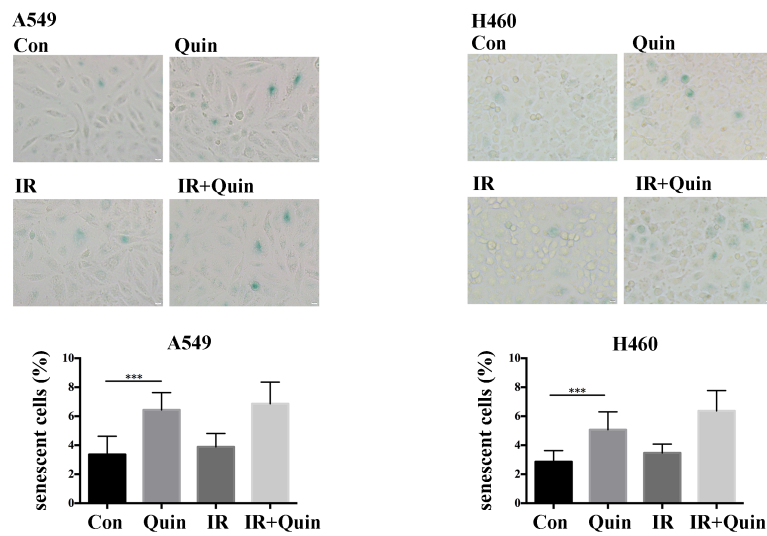

Supplementary Fig.S2 A549 and H460 cells were treated with DMSO or 25μM Quinalizarin for 24h, then exposed to 0 or 4Gy irradiation. After 24h cells were stained for SA-β-gal activity characteristic of senescence. The percentage of senescent cells were quantified. (\*\*\*) $p < 0.001$  Mean  $\pm$  S.D. were calculated for three independent experiments.
